# Supplementary material for: Polymorphisms of long non-coding RNA HOTAIR with breast cancer susceptibility and clinical outcomes for a southeast Chinese Han population
Source: PubMed Central journal article supplement (PMC5790492; doi:10.18632/oncotarget.23343), 2017-12-16
Supplement: oncotarget-09-3677-s001.pdf [file oncotarget-09-3677-s001.pdf]

## Polymorphisms of long non-coding RNA HOTAIR with breast cancer susceptibility and clinical outcomes for a southeast Chinese Han population

### SUPPLEMENTARY MATERIALS

**Supplementary Table 1: Stratified analysis on associations between rs4759314 polymorphism and breast cancer risk**

| Characteristics         | rs4759314         |                      | P     | OR (95% CI) <sup>a</sup> | P <sup>b</sup> |
|-------------------------|-------------------|----------------------|-------|--------------------------|----------------|
|                         | Cases(AA/GA + GG) | Controls(AA/GA + GG) |       |                          |                |
| Age                     |                   |                      |       |                          | 0.606          |
| ≤40                     | 223/53            | 237/44               | 0.391 | 1.22 (0.78–1.91)         |                |
| >40                     | 578/115           | 580/109              | 0.752 | 1.05 (0.78–1.41)         |                |
| BMI                     |                   |                      |       |                          | 0.169          |
| ≤24                     | 575/126           | 550/98               | 0.186 | 1.22 (0.91–1.64)         |                |
| >24                     | 226/42            | 267/55               | 0.454 | 0.84 (0.53–1.33)         |                |
| Age at menarche         |                   |                      |       |                          | 0.653          |
| ≤15                     | 406/90            | 410/88               | 0.808 | 1.04 (0.75–1.45)         |                |
| >15                     | 395/78            | 407/65               | 0.410 | 1.17 (0.81–1.70)         |                |
| Menopausal status       |                   |                      |       |                          | 0.142          |
| Premenopausal           | 510/110           | 534/90               | 0.160 | 1.25 (0.92–1.70)         |                |
| Postmenopausal          | 285/57            | 266/61               | 0.465 | 0.85 (0.57–1.30)         |                |
| Age at menopause        |                   |                      |       |                          | 0.682          |
| ≤50                     | 166/33            | 133/34               | 0.352 | 0.77 (0.44–1.34)         |                |
| >50                     | 119/24            | 133/27               | 0.825 | 0.93 (0.50–1.74)         |                |
| Age at first live birth |                   |                      |       |                          | 0.148          |
| ≤25                     | 426/98            | 546/97               | 0.212 | 1.22 (0.89–1.68)         |                |
| >25                     | 344/63            | 235/52               | 0.367 | 0.83 (0.55–1.25)         |                |
| ER status               |                   |                      |       |                          | 0.087          |
| Positive                | 521/123           |                      | 0.126 | 1.23 (0.94–1.61)         |                |
| Negative                | 280/45            |                      | 0.249 | 0.81 (0.56–1.16)         |                |
| PR status               |                   |                      |       |                          | 0.066          |
| Positive                | 453/113           |                      | 0.059 | 1.31 (0.99–1.72)         |                |
| Negative                | 348/55            |                      | 0.177 | 0.79 (0.56–1.11)         |                |

<sup>a</sup>Adjusted by age, BMI, age at menarche, menopausal status and family history of breast cancer where appropriate.

<sup>b</sup>P for heterogeneity test.

**Supplementary Table 2: Stratified analysis of HOTAIR rs7958904 genotypes on DFS and OS of breast cancer patients**

| Variable               | Disease free survival<br>Genotypes (Relapse/Patients) |             |         |                           |                   | Overall survival<br>Genotypes (Death/Patients) |             |         |                           |                   |
|------------------------|-------------------------------------------------------|-------------|---------|---------------------------|-------------------|------------------------------------------------|-------------|---------|---------------------------|-------------------|
|                        | GG                                                    | HR (95% CI) | GC + CC | HR (95% CI) <sup>a*</sup> | Log-rank <i>p</i> | GG                                             | HR (95% CI) | GC + CC | HR (95% CI) <sup>a*</sup> | Log-rank <i>p</i> |
| Age                    |                                                       |             |         |                           |                   |                                                |             |         |                           |                   |
| ≤40                    | 46/129                                                | 1.00        | 62/147  | 1.16 (0.79–1.70)          | 0.460             | 25/129                                         | 1.00        | 41/147  | 1.35 (0.82–2.23)          | 0.236             |
| >40                    | 122/360                                               | 1.00        | 107/333 | 1.08 (0.83–1.40)          | 0.553             | 81/360                                         | 1.00        | 70/333  | 1.09 (0.79–1.50)          | 0.599             |
| Tumor size             |                                                       |             |         |                           |                   |                                                |             |         |                           |                   |
| ≤2 cm                  | 41/192                                                | 1.00        | 40/193  | 0.94 (0.61–1.46)          | 0.785             | 29/192                                         | 1.00        | 24/193  | 0.77 (0.45–1.33)          | 0.349             |
| >2 cm                  | 127/297                                               | 1.00        | 129/287 | 1.03 (0.81–1.32)          | 0.807             | 77/297                                         | 1.00        | 87/287  | 1.16 (0.85–1.58)          | 0.342             |
| Lymph node involvement |                                                       |             |         |                           |                   |                                                |             |         |                           |                   |
| No                     | 53/250                                                | 1.00        | 51/229  | 1.02 (0.70–1.51)          | 0.906             | 30/250                                         | 1.00        | 20/229  | 0.69 (0.39–1.22)          | 0.206             |
| Yes                    | 115/239                                               | 1.00        | 118/251 | 0.93 (0.72–1.20)          | 0.562             | 76/239                                         | 1.00        | 91/251  | 1.13 (0.83–1.53)          | 0.445             |
| Molecular subtype      |                                                       |             |         |                           |                   |                                                |             |         |                           |                   |
| Luminal type           | 97/313                                                | 1.00        | 94/331  | 0.86 (0.65–1.14)          | 0.299             | 57/313                                         | 1.00        | 52/331  | 0.83 (0.57–1.21)          | 0.324             |
| HER-2 overexpression   | 34/83                                                 | 1.00        | 31/66   | 1.23 (0.76–2.01)          | 0.401             | 23/83                                          | 1.00        | 23/66   | 1.37 (0.77–2.44)          | 0.287             |
| TNBC                   | 37/93                                                 | 1.00        | 44/83   | 1.39 (0.90–2.16)          | 0.141             | 26/93                                          | 1.00        | 36/83   | 1.52 (0.91–2.53)          | 0.108             |

<sup>a</sup>Cox regression analyses for DFS and OS in breast cancer patients according to dominant model.

<sup>\*</sup>Adjusted by age, tumor size, lymph node status, ER,PR and Her-2 status where appropriate.
